# Supplementary material for: Dose-volume-based evaluation of convolutional neural network-based auto-segmentation of thoracic organs at risk
Source: PubMed Central journal article supplement — Phys Imaging Radiat Oncol. 2022 Jul 25;23:109–17. doi: 10.1016/j.phro.2022.07.004 (PMC9352974; doi:10.1016/j.phro.2022.07.004), 2022-07-25
Supplement: mmc1.pdf [file mmc1.pdf]

|                     |                     | Number of patients |    |            |    |         |    |
|---------------------|---------------------|--------------------|----|------------|----|---------|----|
|                     |                     | Training           |    | Validation |    | Testing |    |
|                     |                     | ES                 | LA | ES         | LA | ES      | LA |
|                     | <b>Total number</b> | 25                 | 30 | 6          | 4  | 20      | 20 |
| <b>T-stage</b>      | <b>T1</b>           | 17                 | 6  | 6          | 2  | 15      | 3  |
|                     | <b>T2</b>           | 4                  | 6  |            |    | 3       | 4  |
|                     | <b>T3</b>           | 1                  | 7  |            |    | 1       | 7  |
|                     | <b>T4</b>           | 2                  | 11 |            | 2  | 1       | 5  |
|                     | <b>TX</b>           |                    |    |            |    |         | 1  |
|                     | <b>unknown</b>      | 1                  |    |            |    |         |    |
| <b>N-stage</b>      | <b>N0</b>           | 22                 | 5  | 6          |    | 17      | 5  |
|                     | <b>N1</b>           |                    | 3  |            |    | 2       | 4  |
|                     | <b>N2</b>           | 1                  | 17 |            | 3  | 1       | 8  |
|                     | <b>N3</b>           | 1                  | 3  |            | 1  |         | 3  |
|                     | <b>NX</b>           |                    | 2  |            |    |         |    |
|                     | <b>unknown</b>      | 1                  |    |            |    |         |    |
| <b>M-stage</b>      | <b>M0</b>           | 22                 | 26 | 6          | 3  | 18      | 18 |
|                     | <b>M1</b>           | 2                  | 4  |            | 1  | 2       | 2  |
|                     | <b>unknown</b>      | 1                  |    |            |    |         |    |
| <b>Prescription</b> | <b>3x20Gy</b>       | 10                 |    | 3          |    | 8       |    |
|                     | <b>4x15Gy</b>       | 5                  |    |            |    |         |    |
|                     | <b>5x12Gy</b>       | 1                  |    |            |    |         |    |
|                     | <b>8x7.5Gy</b>      | 9                  |    | 3          |    | 12      |    |
|                     | <b>24x2.75Gy</b>    |                    | 15 |            | 2  |         | 10 |
|                     | <b>30x1.5Gy</b>     |                    | 2  |            | 1  |         | 2  |
|                     | <b>33x2Gy</b>       |                    | 9  |            | 1  |         | 6  |
|                     | <b>35x2Gy</b>       |                    | 4  |            |    |         | 1  |

**Supplementary table S1:** Patient characteristics

The model had a vgg16 backbone as provided by the same module with the previously discussed pretrained encoderweights. The decoder part had a 1024, 512, 256, 128, 64 structure regarding the amount of convolution filters with randomized starting values for the weights. The start of the model used three convolution filters to go from a 256x256x1 image to a 256x256x3 image, as the pretrained encoders were based on RGB images.

This basically cloned the 256x256 image so there were three of them. The activation function was a softmax and the optimizer was an Adam with a linear rectifier of 0.0001. There was no use of ensemble techniques.

| OAR                 | $\hat{p} > 0.5$ | $\hat{p} > 0.9$ | $\hat{p} > 0.99$ | $\hat{p} > 0.999$ |
|---------------------|-----------------|-----------------|------------------|-------------------|
| All OARs            | 0.824           | 0.822           | 0.819            | 0.815             |
| Heart               | 0.910           | 0.909           | 0.909            | 0.908             |
| Esophagus           | 0.720           | 0.713           | 0.706            | 0.697             |
| Lungs               | 0.977           | 0.976           | 0.974            | 0.971             |
| Trachea             | 0.840           | 0.839           | 0.836            | 0.834             |
| Spinal cord         | 0.796           | 0.792           | 0.788            | 0.783             |
| Main left bronchus  | 0.754           | 0.752           | 0.750            | 0.746             |
| Main right bronchus | 0.775           | 0.773           | 0.770            | 0.767             |

**Supplementary table S2:** Average Dice score coefficients between the auto-segmented and manually delineated OAR for different thresholds of  $\hat{p}$ .

| OAR                 | Mean HD95 ± STD [mm] | HD95 from previous studies on auto-segmentation [mm] | HD95 from previous studies on inter-observer variability [mm] |
|---------------------|----------------------|------------------------------------------------------|---------------------------------------------------------------|
| Lungs               | 6.9 ± 21.8           | 8.0 [39]                                             | 0.2 [44]                                                      |
| Trachea             | 11.8 ± 20.6          | 0.2 [23]<br>2.1 [42]                                 |                                                               |
| Esophagus           | 11.6 ± 12.6          | 0.3 [23]<br>9.3 [39]<br>3.4 [42]<br>4.5 [16]         |                                                               |
| Heart               | 17.6 ± 15.7          | 0.2 [23]<br>8.0 [39]<br>2.0 [42]<br>4.6 [16]         | 0.8 [43]                                                      |
| Spinal cord         | 29.6 ± 29.6          | 8.7 [39]<br>1.2 [16]                                 | 0.8 [39]<br>0.8 [43]                                          |
| Main left bronchus  | 19.4 ± 18.1          |                                                      |                                                               |
| Main right bronchus | 16.8 ± 38.4          |                                                      |                                                               |

**Supplementary table S3:** 95th percentile Hausdorff distance between the manual and automatic contours for each OAR and a summary of average Hausdorff distances for automatic segmentation methods (including CNN methods) of thoracic OARs found in literature.
